# Supplementary material
Source: PubMed Central journal article supplement (PMC6993861)
Supplement: supp_f1_dez247.pdf [file supp_f1_dez247.pdf]

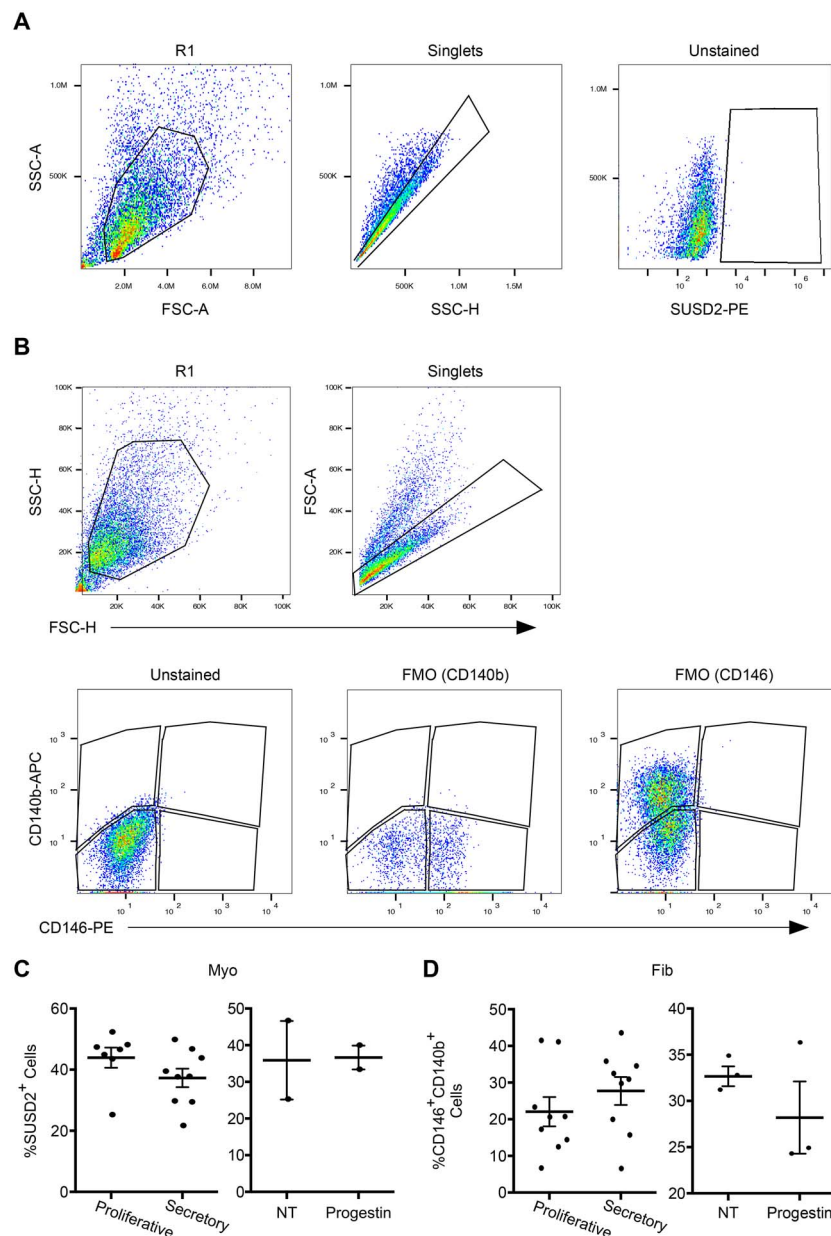

**Supplementary Figure S1 Myometrial and fibroid cells were assessed for CD146/CD140b and SUSD2 expression by flow cytometry and gating strategies. (A) gating strategy for SUSD2 expression. (B) gating strategy for CD146 and CD140b expression. Unstained are cells that were not stained with either antibody. FMO (CD140b) were stained with CD146-PE but not CD140b-APC. FMO (CD146) were stained with CD140b-APC but not CD146. (C) Graphs showing the percentage of SUSD2<sup>+</sup> cells from patient samples by stage of the menstrual cycle (proliferative, n = 6 and secretory, n = 9, t-test) and hormone treatment (NT, non-treated, n = 2 and progesterin treated, n = 2). (D) Graphs showing the percentage of CD146<sup>+</sup>CD140b<sup>+</sup> cells from patient samples by stage of the menstrual cycle (proliferative, n = 9 and secretory, n = 9, t-test) and hormone treatment (NT, n = 3 and progesterin treated, n = 3, t-test).**
