# Supplementary material
Source: PubMed Central journal article supplement (PMC6993861)
Supplement: supp_f2_dez247.pdf [file supp_f2_dez247.pdf]

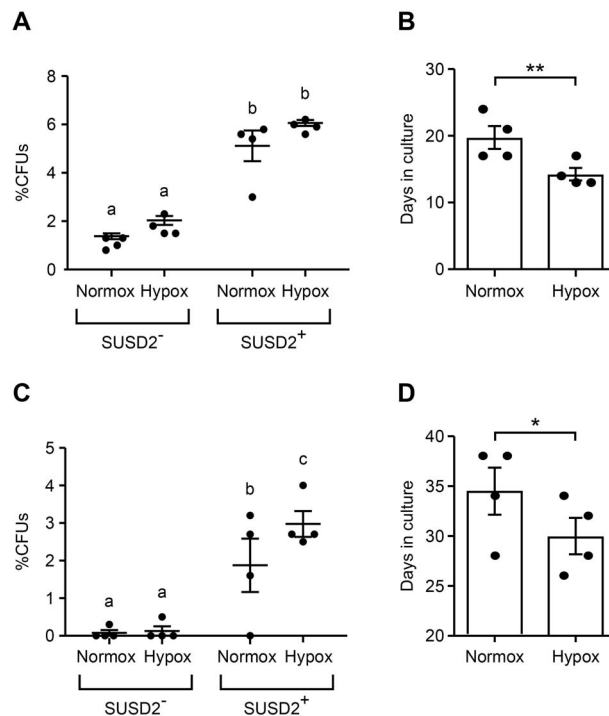

**Supplementary Figure SII Myometrial and fibroid cell selected for SUSD2 expression and assessed for colony formation efficiency in normoxic and hypoxic conditions.** The percentage of colony forming units (CFU) by Myo (**A**) and Fib (**C**) SUSD2<sup>-</sup> and SUSD2<sup>+</sup> cells grown under normal (20%, Normox) and hypoxic (2%, Hypox) oxygen conditions. Different letters indicate significance at  $p < 0.05$  ( $n = 4$ ). (B, D) days to colony formation for Myo and Fib cells (both SUSD2<sup>-</sup> and SUSD2<sup>+</sup> grown in different wells of the same dish), respectively, grown under Normox and Hypox conditions. Statistical analysis performed by paired t-test ( $n = 4$ ).  $P = 0.008$  for (**B**),  $P = 0.018$  for (**D**).
